# Supplementary material for: Hollow Li1.2Mn0.54Ni0.13Co0.13O2 micro-spheres synthesized by a co-precipitation method as a high-performance cathode material for Li-ion batteries
Source: Royal Society of Chemistry journal article supplement (doi:10.1039/c6ra13265k), 2016-01-01
Supplement: c6ra13265k1.pdf [file c6ra13265k1.pdf]

## Electronic supporting information

### **Hollow $\text{Li}_{1.2}\text{Mn}_{0.54}\text{Ni}_{0.13}\text{Co}_{0.13}\text{O}_2$ micro-spheres synthesized by a co-precipitation method as high-performance cathode material for Li-ion batteries**

Yanxiu Li,<sup>a, b</sup> Jun Mei,<sup>b</sup> Xiaodong Guo,<sup>a</sup> Benhe Zhong,<sup>\*a</sup> Hao Liu,<sup>b</sup> Guobiao Liu,<sup>\*a</sup>

Shixue Dou<sup>c</sup>

<sup>a</sup> School of Chemical Engineering, Sichuan University, Chengdu 610065, China

<sup>b</sup> Chengdu Green Energy and Green Manufacturing Technology R&D Center, Chengdu

Development Center of Science and Technology, China Academy of Engineering Physics,

Chengdu 610207, China

<sup>c</sup> Institute for Superconducting and Electronic Materials, University of Wollongong, Wollongong,

NSW 2522, Australia

\*Corresponding author: Benhe Zhong      E-mail address: zhongbenhe@163.com

Guobiao Liu      E-mail address: guobiaoliu@sina.com

#### **Supporting Figure and Tables**

The presence and homogenous distribution of Ni, Co, and Mn elements inside the hollow micro-spheres was identified by EDX chemical mapping of a halved sphere. The corresponding images are shown in Fig. S1.

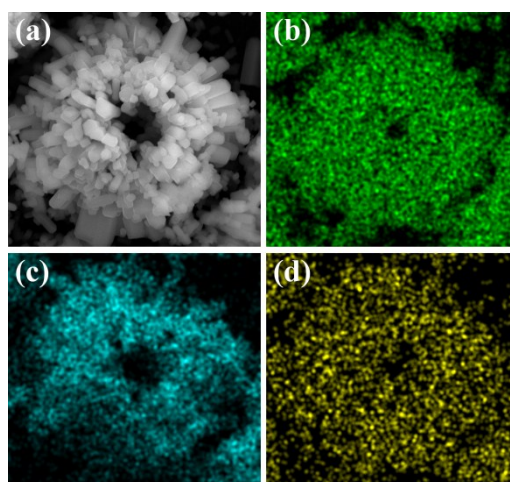

**Fig. S1** SEM/EDX electron image (a) and element mapping images of Mn (b), Ni (c), Co (d) in a h-LMNC particle.

**Table S1** Element molar ratios of s-LNCM and h-LNCM obtained from ICP analysis.

| Samples | Element       | Li    | Mn     | Ni    | Co    |
|---------|---------------|-------|--------|-------|-------|
| s-LNCM  | Content (ppm) | 5.365 | 19.398 | 4.835 | 4.911 |
|         | Molar ratio   | 1.197 | 0.541  | 0.128 | 0.130 |
| h-LNCM  | Content (ppm) | 5.892 | 21.268 | 5.343 | 5.426 |
|         | Molar ratio   | 1.199 | 0.541  | 0.129 | 0.131 |

**Table S2** Specific surface area, pore volume and average pore diameter of s-LNCM and h-LNCM obtained by nitrogen absorption method.

| Sample | Specific surface area<br>( $\text{m}^2 \text{g}^{-1}$ ) | Pore volume<br>( $\text{cm}^3 \text{g}^{-1}$ ) | Average pore diameter<br>(nm) |
|--------|---------------------------------------------------------|------------------------------------------------|-------------------------------|
| s-LNCM | 1.127                                                   | 0.0266                                         | 9.429                         |
| h-LNCM | 1.631                                                   | 0.0249                                         | 6.105                         |

**Table S3** Specific surface area, pore volume and average pore diameter of s-LNCM

and h-LNCM obtained by mercury intrusion method.

| Sample | Specific surface area             |  | Pore Volume                        |  | Average pore diameter |  |
|--------|-----------------------------------|--|------------------------------------|--|-----------------------|--|
|        | (m <sup>2</sup> g <sup>-1</sup> ) |  | (cm <sup>3</sup> g <sup>-1</sup> ) |  | (μm)                  |  |
| s-LNCM | 0.7851                            |  | 0.0594                             |  | 0.3027                |  |
| h-LNCM | 1.3603                            |  | 0.4700                             |  | 1.3820                |  |

**Table S4** The values of  $R_e$ ,  $R_{SEI}$  and  $R_{ct}$  of h-LMNC and s-LMNC after initial cycle

and 100 cycles.

| Samples | $R_e$ (Ω)       |                   | $R_{SEI}$ (Ω)   |                   | $R_{ct}$ (Ω)    |                   |
|---------|-----------------|-------------------|-----------------|-------------------|-----------------|-------------------|
|         | 1 <sup>st</sup> | 100 <sup>th</sup> | 1 <sup>st</sup> | 100 <sup>th</sup> | 1 <sup>st</sup> | 100 <sup>th</sup> |
| h-LMNC  | 2.381           | 3.433             | 15.61           | 81.02             | 54.73           | 339.6             |
| s-LMNC  | 2.453           | 3.284             | 21.52           | 134.5             | 85.49           | 832.2             |
